# Supplementary material for: In Vivo Validation of a Novel Computational Approach to Assess Microcirculatory Resistance Based on a Single Angiographic View
Source: MDPI journal article supplement (doi:10.3390/jpm12111798), 2022-10-31
Supplement: s1 [file s1]

**[Supplementary Material]**

**In vivo validation of a novel computational approach to assess microcirculatory resistance  
based on a single angiographic view**

**Yongzhen Fan <sup>1,2</sup>, Simone Fezzi <sup>3,4</sup>, Pengcheng Sun <sup>5</sup>, Nan Ding <sup>5</sup>, Xiaohui Li <sup>5</sup>, Xiaorong Hu <sup>1,2</sup>,  
Shuang Wang <sup>6</sup>, William Wijns <sup>3</sup>, Zhibing Lu <sup>1,2,\*</sup> and Shengxian Tu <sup>7,\*</sup>**

<sup>1</sup> Department of Cardiology, Zhongnan Hospital of Wuhan University, Wuhan 430071, China

<sup>2</sup> Institute of Myocardial Injury and Repair, Wuhan University, Wuhan 430072, China

<sup>3</sup> The Lambe Institute for Translational Medicine, the Smart Sensors Lab and Curam, University of Galway, University Road, H91 TK3 Galway, Ireland

<sup>4</sup> Division of Cardiology, Department of Medicine, University of Verona, 37129 Verona, Italy

<sup>5</sup> Shanghai Pulse Medical Technology Inc., Shanghai 200233, China

<sup>6</sup> Department of Cardiovascular Ultrasound, Zhongnan Hospital of Wuhan University, Wuhan 430071, China

<sup>7</sup> Biomedical Instrument Institute, School of Biomedical Engineering, Shanghai Jiao Tong University, Shanghai 200240, China

### Supplementary Figure S1. Study flow-chart

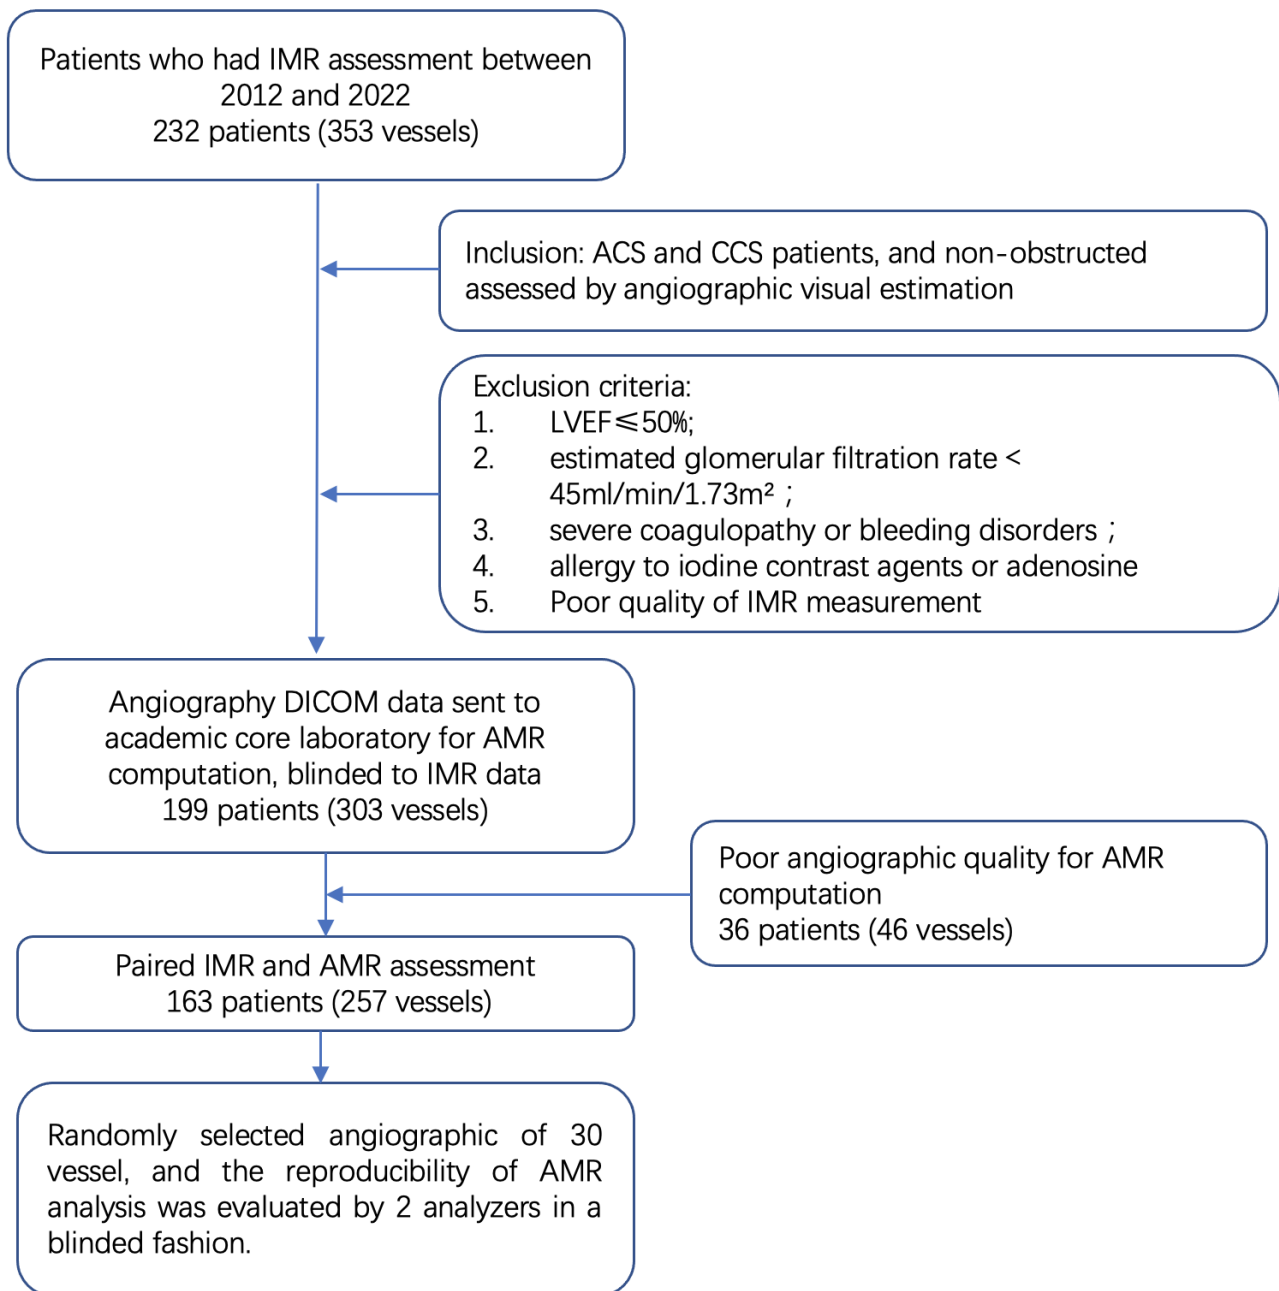

AMR, angio-derived microcirculatory resistance; IMR, index of microvascular resistance; LVEF, left ventricle ejection fraction

Supplementary Figure S2. Scatter plot of microvascular resistance according to the clinical presentation and the presence of diabetes mellitus

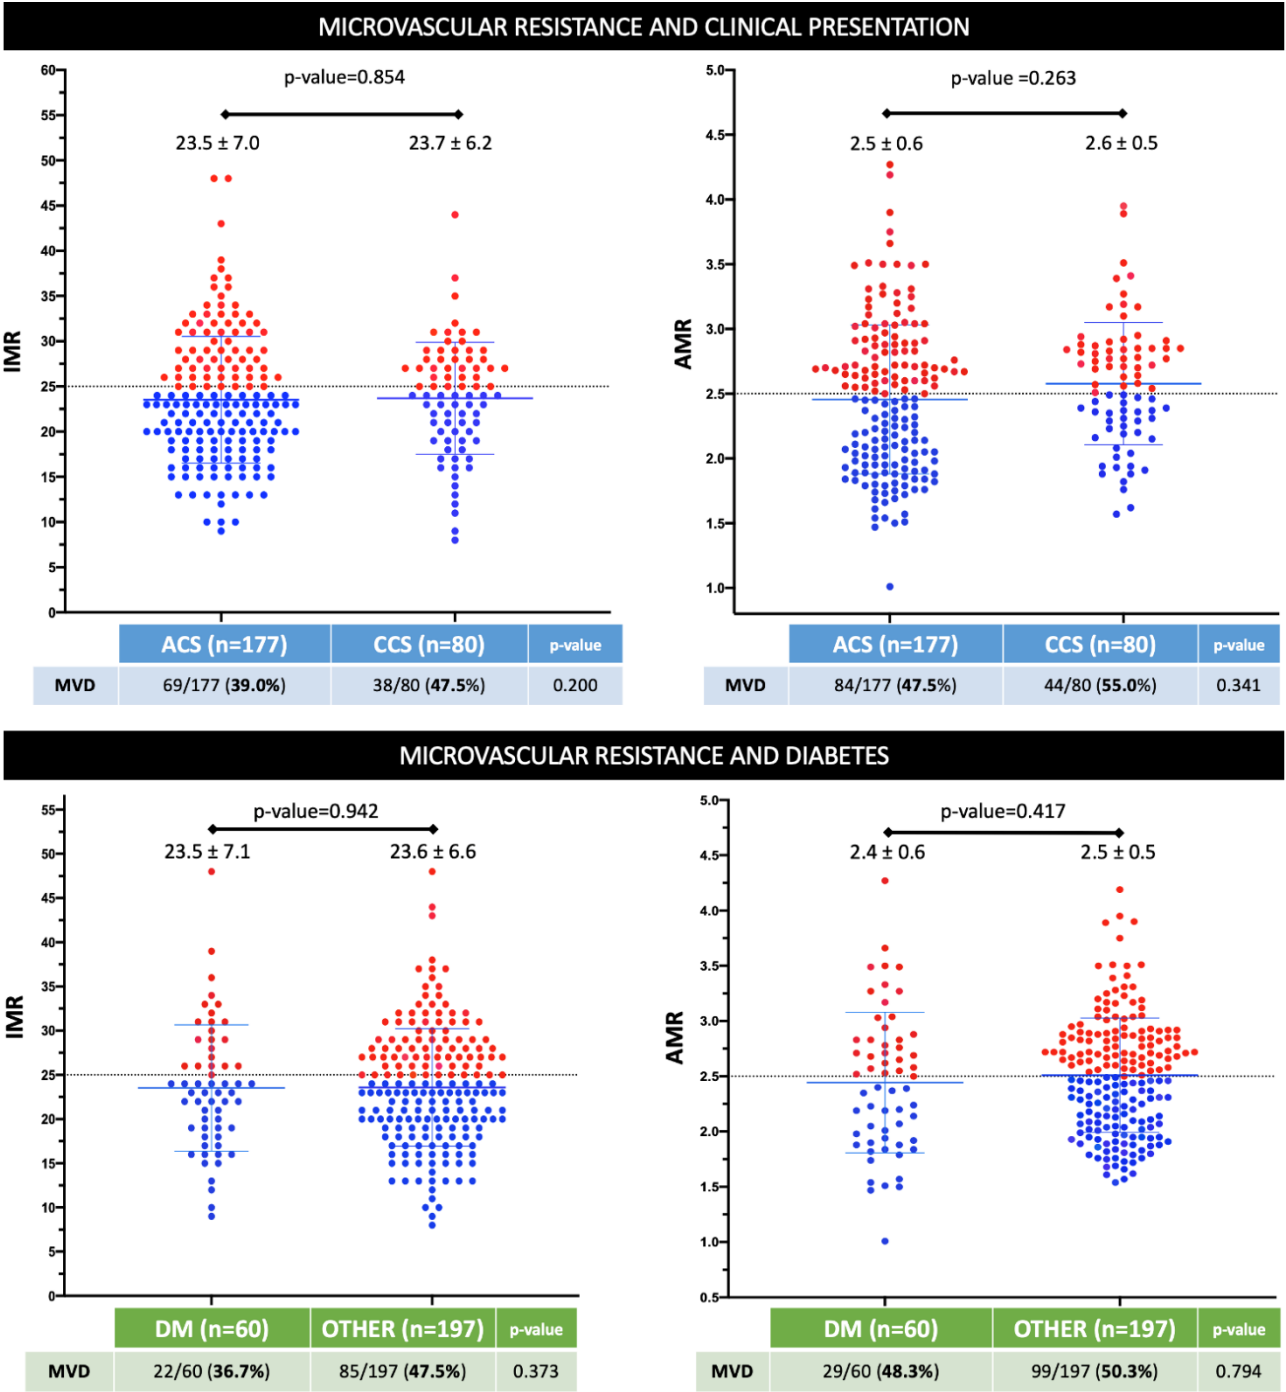

ACS, acute coronary syndrome; AMR, angio-derived microcirculatory resistance; CCS, chronic coronary syndrome; DM, diabetes mellitus; IMR, index of microvascular resistance; MVD, microvascular dysfunction
